# Supplementary material for: Mesoporous silica grafted with multiply bonded dimolybdenum cations: XAFS analysis and catalytic activity in cyclopentadiene polymerisationElectronic Supplementary Information available. See http://www.rsc.org/suppdata/cp/b1/b108320a/
Source: Royal Society of Chemistry journal article supplement (doi:10.1039/b108320a), 2002-01-18

**Table S1** Mo K-edge EXAFS-derived structural parameters for

[Mo<sub>2</sub>(AA)<sub>2</sub>(AN)<sub>4</sub>](BF<sub>4</sub>)<sub>2</sub> (**2**) and [Mo<sub>2</sub>(AA)<sub>2</sub>(AN)<sub>4</sub>](BF<sub>4</sub>)<sub>2</sub>/MCM-41 (AA =  $\mu$ -CH<sub>3</sub>CONH)

| Sample                   | Atom | CN     | $r/\text{\AA}$ | $2\sigma^2/\text{\AA}^2$ | $E_f/\text{eV}$ | $R$ (%) |
|--------------------------|------|--------|----------------|--------------------------|-----------------|---------|
| <b>2</b> (3)             | O    | 2.0(2) | 2.076(9)       | 0.0063(19)               | -3.3(6)         | 22.4    |
|                          | Mo   | 1.0(1) | 2.132(2)       | 0.0031(2)                |                 |         |
|                          | N    | 2      | 2.12           | 0.007                    |                 |         |
|                          | C    | 2      | 3.232(13)      | 0.0116(24)               |                 |         |
| <b>2</b> /MCM-41 (6)     | O    | 3.0(2) | 2.070(6)       | 0.0049(11)               | -12.2(6)        | 29.5    |
|                          | Mo   | 1.0(1) | 2.109(3)       | 0.0049(3)                |                 |         |
| <b>2</b> /MCM-41/air (3) | O    | 1.5(1) | 1.683(3)       | 0.0063(5)                | 1.4(5)          | 30.0    |
|                          | O    | 3.0(3) | 1.964(4)       | 0.0113(9)                |                 |         |
|                          | O    | 1.0(1) | 2.128(11)      | 0.0099(27)               |                 |         |
|                          | Mo   | 1.0(1) | 2.585(2)       | 0.0080(3)                |                 |         |
|                          | Si   | 1.0(4) | 3.730(18)      | 0.0085(33)               |                 |         |

**Figure S1** Mo K-edge EXAFS and Fourier transforms for (a)  $[\text{Mo}_2(\text{AA})_2(\text{AN})_4](\text{BF}_4)_2$  (**2**), (b) **2**/MCM-41 and (c) **2**/MCM-41/air. The solid line represents the experimental data and the dashed line shows the best fit using parameters given in Table S1.

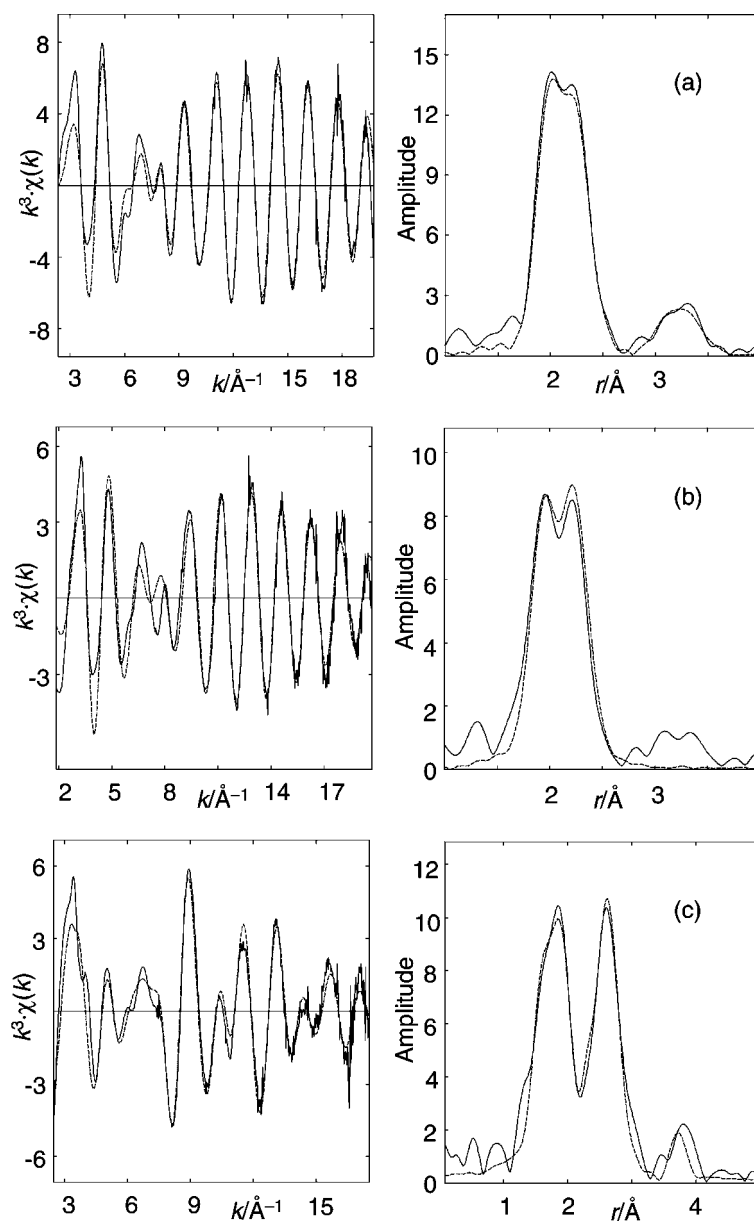

Supplement: suppdata.pdf [file suppdata.pdf]
